# Supplementary material for: Leukocyte invasion of the brain after peripheral trauma in zebrafish (Danio rerio)
Source: PubMed Central journal article supplement (PMC9356012; doi:10.1038/s12276-022-00801-4), 2022-07-13
Supplement: 12276_2022_801_MOESM1_ESM.pdf [file 12276_2022_801_MOESM1_ESM.pdf]

## Supplementary information

Supplementary Table 1, Supplementary Fig. 1-6, and Supplementary Video 1-7.

### Supplementary Table

**Supplementary Table 1. List of primers used in the current study.**

| Name                          | Sequence (5'-3')          |
|-------------------------------|---------------------------|
| <i>Primers for Genotyping</i> |                           |
| ZF_illb_E4_GF                 | CGACATTTACATCTGCACCG      |
| ZF_illb_E4_GR                 | GTACCTTGGATGACGTTCGC      |
| <i>Primers for qPCR</i>       |                           |
| ZF_illb_QF                    | TGGA CTTCGCAGCACAAAATG    |
| ZF_illb_QR                    | GTTCACTTCACGCTCTTGGATG    |
| ZF_mfa_QF                     | TTCACGCTCCATAAGACCCA      |
| ZF_mfa_QR                     | CCGTAGGATTCAGAAAAGCG      |
| ZF_il34_QF                    | ATCGGACCATGCTTTGCCTG      |
| ZF_il34_QR                    | CCCTACAACAGCAACACGGA      |
| ZF_il6_QF                     | TGAAGACACTCAGAGACGAGCAGTT |
| ZF_il6_QR                     | AGGTTTGAGGAGAGGAGTGCTGAT  |
| ZF_il8_QF                     | CCTGGCATTCTGACCATCAT      |
| ZF_il8_QR                     | GATCTCCTGTCCAGTTGTCAT     |
| ZF_il10_QF                    | TCAGAGCAGGAGAGTCGAATGCA   |
| ZF_il10_QR                    | CGATTGGGGTTGTGGAGTGCTT    |
| ZF_ccl2_QF                    | GTCTGGTGCTCTTCGCTTTC      |
| ZF_ccl2_QR                    | TGCAGAGAAGATGCGTCGTA      |
| ZF_lcp1_QF                    | GAAGCTCTGATCGCTCTGCT      |

|                                      |                        |
|--------------------------------------|------------------------|
| ZF_lcp1_QR                           | GTTGTTGATTTTGGGGCATC   |
| ZF_caspase3_QF                       | TAGTGTGTGTGTTGCTCAGTC  |
| ZF_caspase3_QR                       | CTCGACAAGCCTGAATAAAG   |
| ZF_b-actin_QF                        | TTCCTTCCTGGGTATGGAATC  |
| ZF_b-actin_QR                        | GCACTGTGTTGGCATAACAGG  |
| <hr/>                                |                        |
| <b><i>Primers for ISH Probes</i></b> |                        |
| ZF_illb_PF                           | TGCAATGCACGATTTGCGAT   |
| ZF_illb_PF                           | AGAATAAGCAGCACTTGGGGA  |
| ZF_il6_PF                            | TCAGAGACGAGCAGTTTGAGAG |
| ZF_il6_PR                            | CCTCTTGGGGTCTTTCCCTC   |
| <hr/>                                |                        |

Supplementary Figures

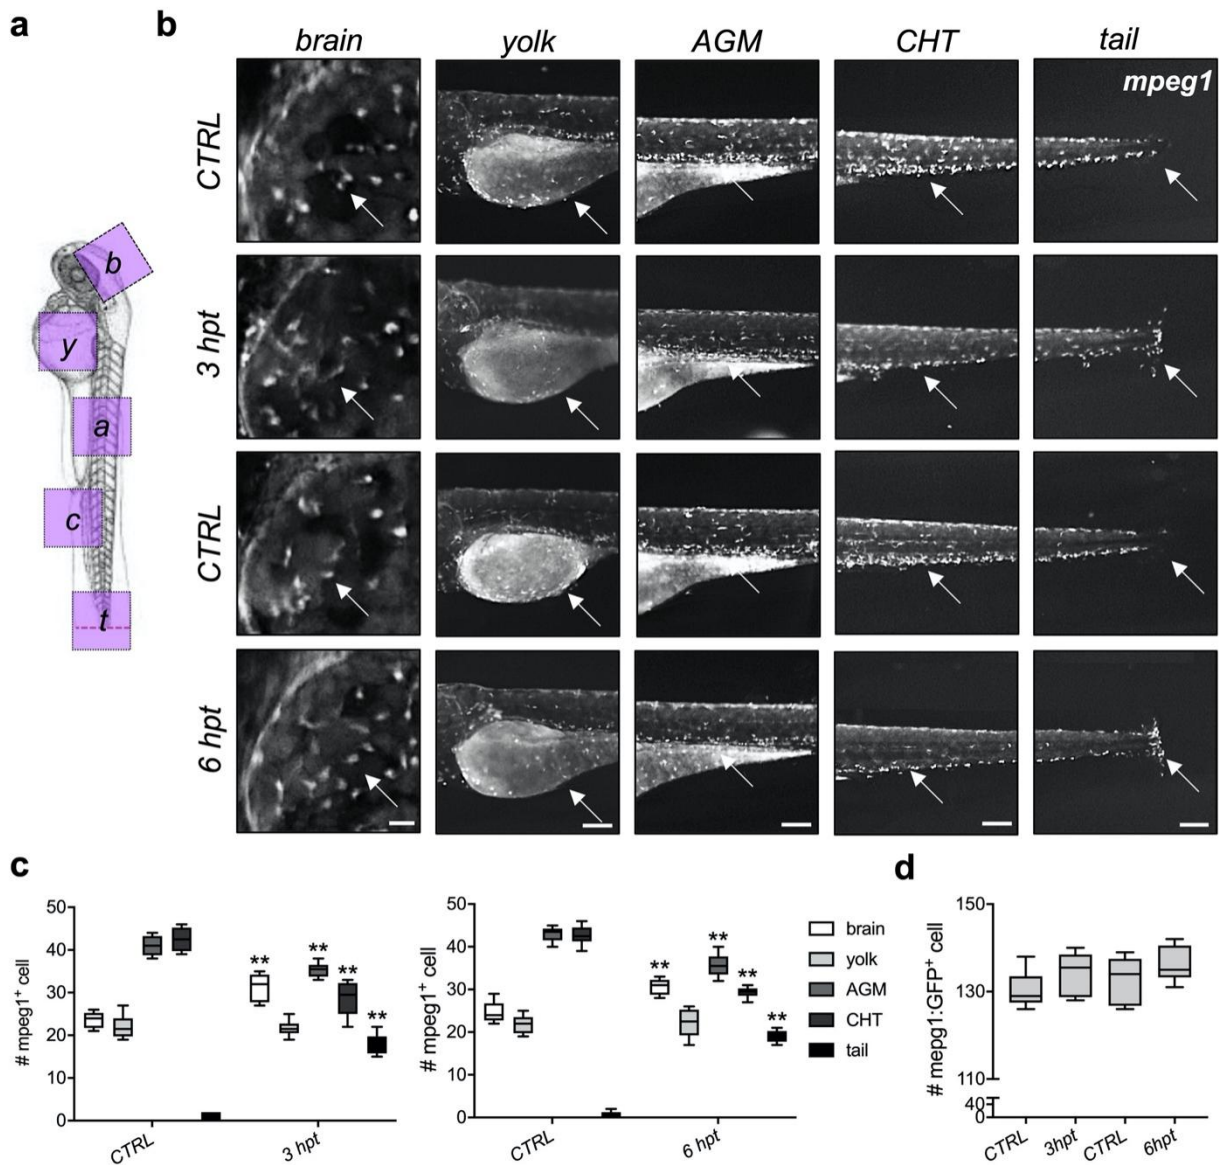

**Supplementary Fig. 1. Redistribution of macrophages in response to peripheral trauma.** (a-c) The number of *mpeg1*<sup>+</sup> macrophages in various positions, including the brain (b), yolk (y), aorta-gonad-mesonephros (AGM, a), caudal hematopoietic tissue (CHT, c) and tail (t), and the total number of *mpeg1*<sup>+</sup> macrophages (d) of zebrafish body at 3 hpt and 6 hpt. Independent t-test, \*\*,  $p < 0.01$  compared with CTRL. Scale bar, 40  $\mu$ m (brain), 200  $\mu$ m (yolk, AGM, CHT, and tail).

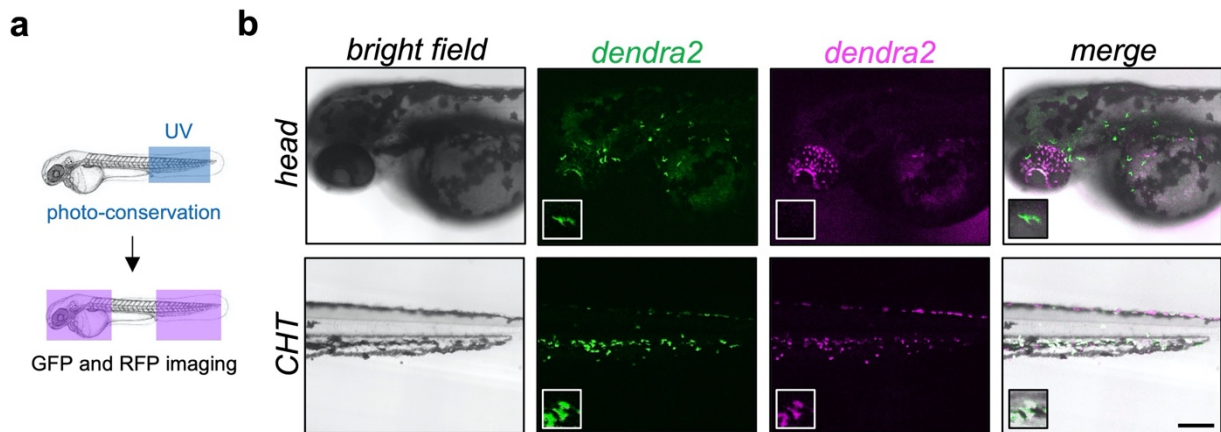

**Supplementary Fig. 2. Dendra2 photo-conservation and confirmation.** (a) Schematic diagram of the body regions for photo-conservation (tail/CHT) and confirmation (head and tail/CHT). (b) Photo-conserved magenta+ macrophages were detected in the tail/CHT region but not in the head region. Scale bar, 200  $\mu\text{m}$ .

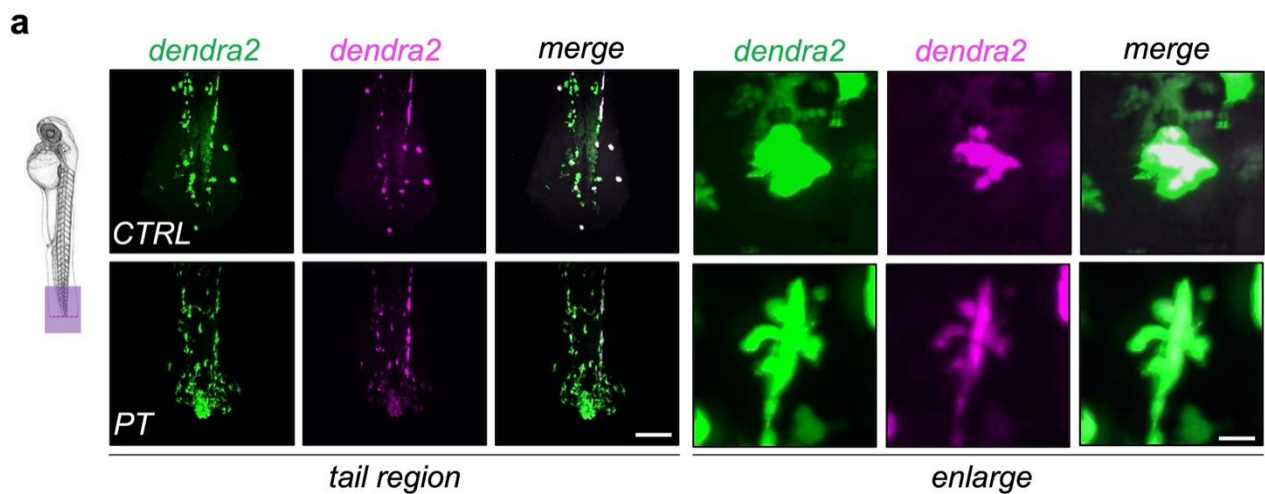

**Supplementary Fig. 3. Recruitment of photo-conserved macrophages in the traumatic site.** (a) Photo-conserved magenta+ macrophages were detected in the traumatic site of 4dpf zebrafish larvae. Scale bar, 200  $\mu\text{m}$ , 20  $\mu\text{m}$  (enlarge).

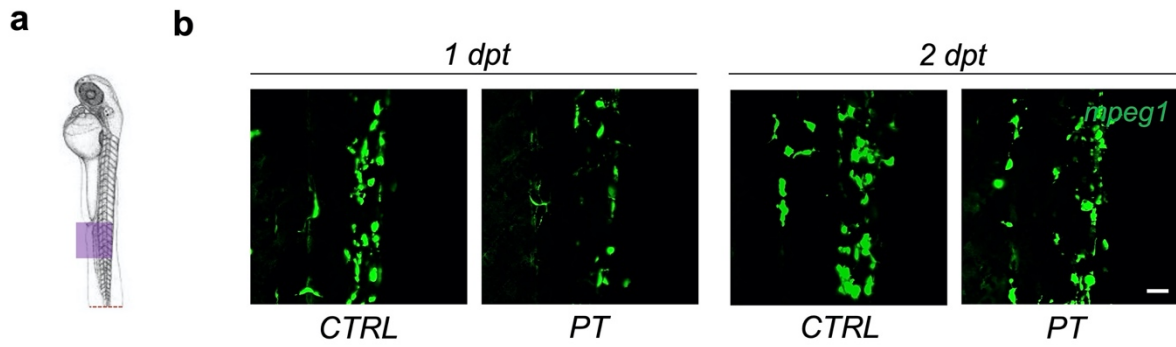

**Supplementary Fig. 4. Peripheral macrophages return to caudal hematopoietic tissue after peripheral trauma.** (a-b) Light-sheet imaging showed that *mpeg1*<sup>+</sup> macrophages returned to caudal hematopoietic tissue at 2 days post-trauma. Scale bar, 100  $\mu$ m.

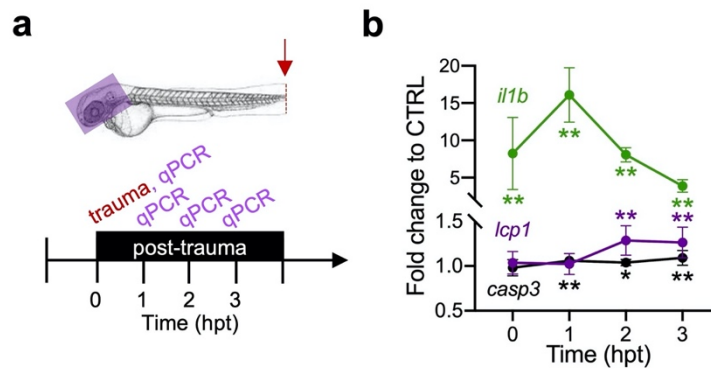

**Supplementary Fig. 5. Inflammatory, apoptotic, and leukocyte responses in the brain after peripheral trauma.** (a) Experimental setup. (b) qPCR results show that inflammatory cytokine (*il1b*), apoptosis (*caspase3*), and leukocyte invasion (*lcp1*) sequentially increased in the brain after peripheral trauma. One-way ANOVA, \*\*,  $p < 0.01$  compared with CTRL.

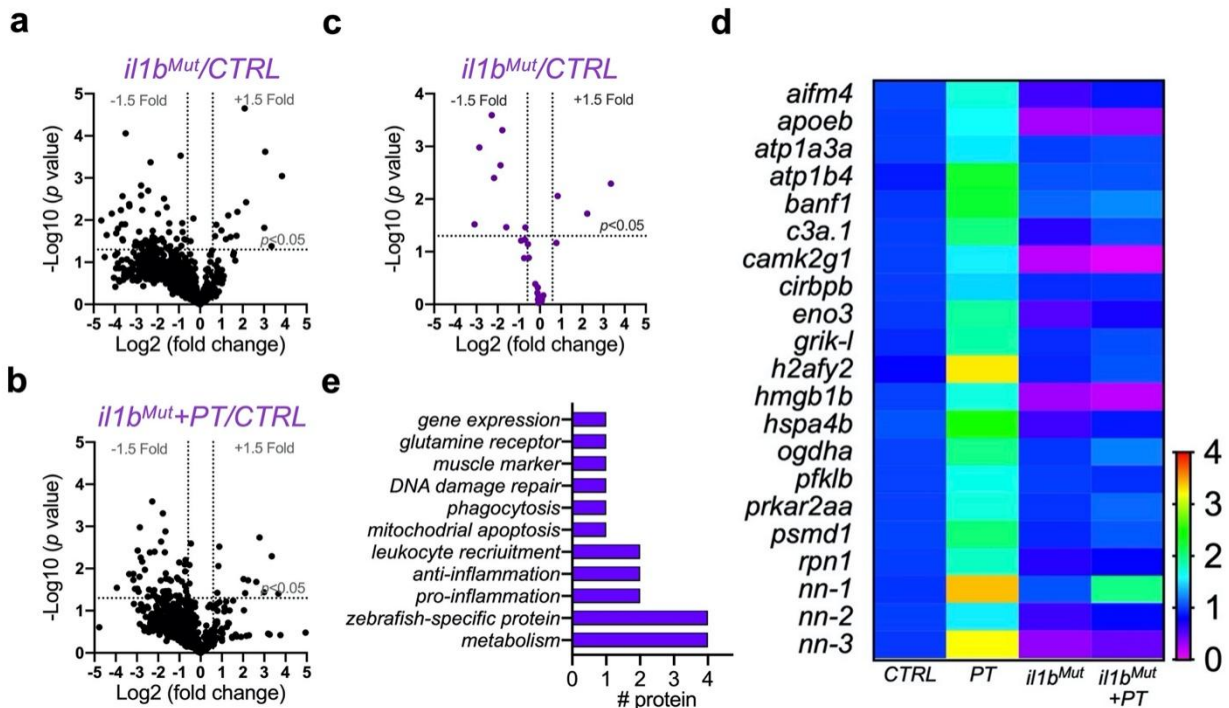

**Supplementary Fig. 6. Systemic inflammation-mediated brain proteomic responses to peripheral trauma.**

(a-b) The volcano plot illustrated the proteins significantly ( $p < 0.05$ , independent t-test) changed ( $> 1.5$  folds) in the brain at 1 dpt in *il1b<sup>Mut</sup>/CTRL* and *il1b<sup>Mut</sup>+PT/CTRL*. (c) The volcano plot illustrated the identified proteins significantly changed in the brain of *il1b<sup>Mut</sup>* zebrafish at 1 dpt. (d) Heatmap illustrated the fold change of identified proteins among CTRL, PT, *il1b<sup>Mut</sup>*, and *il1b<sup>Mut</sup>+PT* groups. (e) Classification of identified proteins into various molecular pathways or processes.

## **Supplementary Videos**

**Supplementary Video 1. Leukocyte activities in the brain of zebrafish larvae without peripheral trauma.**

Red arrow, active leukocytes.

**Supplementary Video 2. Leukocyte activities in the brain of zebrafish larvae with peripheral trauma.** Red arrow, active leukocytes.

**Supplementary Video 3. Leukocyte activities in the brain of *illb* mutant zebrafish larvae.** Red arrow, active leukocytes.

**Supplementary Video 4. Leukocyte activities in the brain of *illb* mutant zebrafish larvae with peripheral trauma.** Red arrow, active leukocytes.

**Supplementary Video 5. Distribution pattern 1 of active leukocytes in the mid-hindbrain boundary of zebrafish larvae.** Red arrow, active leukocytes.

**Supplementary Video 6. Distribution pattern 2 of active leukocytes within the brain of zebrafish larvae.** Red arrow, active leukocytes.

**Supplementary Video 7. Distribution pattern 3 of active leukocytes migrating from the peripheral tissue into the brain.** Red arrow, active leukocytes.
